# Supplementary material for: Factors Associated With Public Trust in Pharmaceutical Manufacturers
Source: PubMed Central journal article supplement (PMC10015300; doi:10.1001/jamanetworkopen.2023.3002), 2023-03-14
Supplement: jamanetwopen-e233002-s001.pdf [file jamanetwopen-e233002-s001.pdf]

## **Data Sharing Statement**

Singh. Factors Associated With Public Trust in Pharmaceutical Manufacturers. *JAMA Netw Open*. Published March 14, 2023. doi:10.1001/jamanetworkopen.2023.3002

### **Data**

**Data available:** No
